# Supplementary material
Source: PubMed Central journal article supplement (PMC9330374)
Supplement: jamadermatol-e222815-s001.pdf [file jamadermatol-e222815-s001.pdf]

## Supplemental Online Content

Jiang SW, Flynn MS, Kwock JT, et al. Quality and perceived usefulness of patient-submitted store-and-forward teledermatology images. *JAMA Dermatol*. Published online July 27, 2022. doi:10.1001/jamadermatol.2022.2815

**eFigure.** Experimental set up to evaluate 1200 patient-submitted images

**eAppendix.** Questionnaire assigned to each image and instructions for evaluators

This supplemental material has been provided by the authors to give readers additional information about their work.

# eFigure. Experimental set up to evaluate 1200 patient-submitted images

## A

| Condition                      | Number | Percentage |
|--------------------------------|--------|------------|
| Analyzed                       | 1200   | 41.2%      |
| De-identification not possible | 72     | 2.5%       |
| No skin condition depicted     | 259    | 8.9%       |
| Not analyzed                   | 1384   | 47.4%      |

## B

| Images    | Evaluator 1      | Evaluator 2      | Evaluator 3      |
|-----------|------------------|------------------|------------------|
| 1-200     | Senior faculty 1 | Junior faculty 1 | Resident 1       |
| 201-400   | Senior faculty 2 | Junior faculty 2 | Resident 2       |
| 401-600   | Senior faculty 3 | Junior faculty 3 | Resident 3       |
| 601-800   | Senior faculty 1 | Senior faculty 2 | Senior faculty 3 |
| 801-1000  | Junior faculty 1 | Junior faculty 2 | Junior faculty 3 |
| 1001-1200 | Resident 1       | Resident 2       | Resident 4       |

eAppendix. Questionnaire assigned to each image and instructions for evaluators

- 1. What type of skin condition do you think is pictured?**
  - Inflammatory
  - Infectious
  - Neoplastic
  - Alopecia
  - Wound
  - Other
  - The purpose of the photo is unclear
  - The image quality is insufficient to make a guess
  
- 2. Is the skin condition positioned at an appropriate distance from the camera?**
  - Too close
  - Too far away
  - Appropriate distance
  
- 3. How is the brightness of the photograph?**
  - Too dark
  - Too bright
  - Well lit
  
- 4. Is the skin condition in focus?**
  - No
  - Yes
  
- 5. Is the background free from distractions (e.g. other people, bright-colored objects, etc.)?**
  - No
  - Yes
  
- 6. Is the image sufficient in quality to include in the patient's chart on Epic?**
  - No
  - Yes
  
- 7. Would you feel comfortable making a medical decision based on this photo?**
  - No
  - Yes
  
- 8. (Optional) Click below if this image is very similar to previous image(s)**
  - Yes, it is similar

1. *What type of skin condition do you think is pictured?*

- *Inflammatory*
- *Infectious*
- *Neoplastic*
- *Alopecia*
- *Wound*
- *Other*
- *The purpose of the photo is unclear*
- *The image quality is insufficient to make a guess*

Please use the table below to guide diagnostic categorization. The table does not have an exhaustive list of diagnoses but can be used to aid in categorization.

| Category                         | Subcategory                           | Diagnosis                                                                                                                                                                                                                                                                            |
|----------------------------------|---------------------------------------|--------------------------------------------------------------------------------------------------------------------------------------------------------------------------------------------------------------------------------------------------------------------------------------|
| Inflammatory<br>(n = 225, 66.2%) | Dermatitis<br>(n = 82, 36.4%)         | Contact dermatitis*, Unspecific eczema*, Hand eczema*, Seborrheic dermatitis*, Atopic dermatitis*, Nummular eczema, Dyshidrotic eczema*, Cheilitis*, Chronic paronychia*, Erythema annulare centrifugum*, Lichen simplex chronicus*, Lichenoid dermatitis, Pseudotinea amiantacea. * |
|                                  | Acne/rosacea<br>(n = 78, 34.7%)       | Acne*, Rosacea*, Hidradenitis suppurativa, Perioral dermatitis                                                                                                                                                                                                                       |
|                                  | Autoimmune<br>(n = 34, 15.1%)         | Morphea*, Cutaneous lupus*, Bullous disease*, Vitiligo*, Poikiloderma* (dermatomyositis), Lichen sclerosus, Amicrobial pustulosis of the folds, Complex aphthosis, Calcinosis cutis.                                                                                                 |
|                                  | Papulosquamous<br>(n = 17, 7.6%)      | Psoriasis*, Pityriasis rosea*, Lichen nitidus*, Pityriasis lichenoides chronica*.                                                                                                                                                                                                    |
|                                  | Others inflammatory<br>(n = 14, 6.2%) | Urticaria*, Insect bite*, Exantema, Postinflammatory hypopigmentation, Postinflammatory hyperpigmentation*, Grover's disease, Pemio Like Eruption, Sarcoidosis, Ulcers*.                                                                                                             |
| Infectious<br>(n = 52, 15.3%)    | Viral<br>(n = 22, 42.3%)              | Warts*, Herpes zoster*, Viral rash*, Eczema herpeticum*, Molluscum contagiosum*, Condylomas*.                                                                                                                                                                                        |
|                                  | Fungal<br>(n = 21, 40.4%)             | Tinea*, Onychomycosis*, Pityriasis Versicolor*, Balanitis, Angular cheilitis*, Candidal intertrigo.                                                                                                                                                                                  |
|                                  | Bacterial<br>(n = 8, 15.4%)           | Ingrown nail*, Folliculitis*, Paronychia*, Furuncle*, Impetigo*, Pyoderma.                                                                                                                                                                                                           |
|                                  | Parasitic<br>(n = 1, 1.9%)            | Demodicosis.                                                                                                                                                                                                                                                                         |
| Neoplastic<br>(n = 32, 9.4%)     | Benign<br>(n = 28, 87.5%)             | Melanocytic nevus*, Seborrheic keratosis*, Actinic Keratosis*, Dermatofibroma*, Epidermal cyst*, Keloid*, Organoid nevus*, Inflamed nevus, Telangiectatic granuloma*, Targetoid Hemosiderotic Hemangioma, Milia*, Inverted follicular keratosis, Cutaneous horn*.                    |
|                                  | Malignant<br>(n = 4, 12.5%)           | Basal cell carcinoma*, Bowen's disease*.                                                                                                                                                                                                                                             |
| Alopecias<br>(n = 15, 4.4%)      | Scarring<br>(n = 8, 53.3%)            | Lichen planus pilaris, Folliculitis decalvans, Non-specified.                                                                                                                                                                                                                        |
|                                  | Non-scarring<br>(n = 7, 46.7%)        | Androgenetic alopecia*, Effluvium telogen, Alopecia Areata*.                                                                                                                                                                                                                         |
| Other<br>(n = 16, 4.7%)          |                                       | Striae distansae*, Scar*, Acne scar*, Burn*, Hematoma*, Erythema ab igne*, Galli-Galli disease, Portwine stain*.                                                                                                                                                                     |

Muñoz-López C, Ramírez-Cornejo C, Marchetti MA, et al. Performance of a deep neural network in teledermatology: a single-centre prospective diagnostic study. *J Eur Acad Dermatology Venereol.* 2021;35(2):546-553. doi:<https://doi.org/10.1111/jdv.16979>

2. *Is the skin condition positioned at an appropriate distance from the camera?*

- *Too close*
- *Too far away*
- *Appropriate distance*

**Too close: the entire skin condition does not fit into the image.**

**Too far away:** the entire skin condition fits into the image, but is positioned far enough such that important details cannot be appreciated without zooming in.

**Appropriate distance:** the entire skin condition fits into the image and is positioned such that important details can be appreciated without zooming in.

3. *How is the brightness of the photograph?*

- *Too dark*
- *Too bright*
- *Well lit*

**Too dark:** visualization of the skin condition is limited by lack of flash or excess shadows in crucial areas of the skin.

**Too bright:** visualization of the skin condition is limited by excess flash or excess bright light in crucial areas of the skin.

**Well lit:** visualization of the skin condition is not limited by excess bright light or excess shadows.

4. *Is the skin condition in focus?*

- *No*
- *Yes*

**No:** the skin condition is blurry and out of focus.

**Yes:** the skin condition is crisp, sharply in-focus, and well-visualized.

5. *Is the background free from distractions (e.g. other people, bright-colored objects, etc.)?*

- *No*
- *Yes*

**No:** the background contains objects or people which draw attention away from the skin condition being portrayed.

**Yes:** the background is limited in or free from distracting features, such as objects or other people.

6. *Is the image sufficient in quality to include in the patient chart on Epic?*

- *No*
- *Yes*

**Please answer “yes” if this image were hypothetically taken in clinic and you would approve of uploading this to the patient’s chart.**

7. *Would you feel comfortable making a medical decision based on this photo?*

- *No*
- *Yes*

**Please answer “yes” if this image could be used to make a diagnosis, manage prescriptions, or recommend a biopsy/clinic visit. Please answer “no” if this image could not be used for the aforementioned functions or if its quality limited its utility in making medical decisions.**

8. *(Optional) Click below if this image is very similar to previous image(s)*

- *Yes, it is similar*

**Please answer “yes” if this image appears very similar to another image on this survey, such that they were taken by the same patient of the same skin condition/area.**
